# Supplementary material for: The detailed balance limit of photochemical energy conversion
Source: Royal Society of Chemistry journal article supplement (doi:10.1039/b914552d), 2009-11-16
Supplement: b914552d.pdf [file b914552d.pdf]

# Electronic Supplementary Information: The detailed balance limit of photochemical energy conversion

Benjamin P. Fingerhut,<sup>a</sup> Wolfgang Zinth<sup>b</sup> and Regina de Vivie-Riedle<sup>\*a</sup>

5

## 10 Parameters of the evolutionary algorithms

Table SM1: Parameters of the evolutionary algorithms

| EA parameters         | (μ,λ)-CMA-ES                         | NSGAII |
|-----------------------|--------------------------------------|--------|
| no. of individuals λ  | 8                                    | 10000  |
| reproducing ind. μ    | 4                                    | 10000  |
| no. of generations    | $\Delta\Phi_{RU} < 1 \cdot 10^{-12}$ | 500    |
| mutation probability  | -                                    | 0.01   |
| crossover probability | -                                    | 0.9    |
| no. of restarts       | 4                                    | -      |
| increase of pop. size | 3                                    | -      |
| time [s]              | $10^{-3}$                            | 1      |

15

## Second order electronic coupling $V_{i0}$

The electronic coupling of charge recombination  $V_{i0}$  is calculated according to an extended SE model: electron-hole recombination occurs by concerted tunneling through all barriers, which lie between chromophore  $i$  and the initial electron donor  $0$ . The electronic coupling matrix element  $V_{i0}$  is evaluated up to second order perturbation theory.

$$V_{i0} = V^{(0)} + V^{(1)} + V^{(2)} \quad (A1)$$

The extent and energetic position of inbetween lying chromophores is taken into account (see Fig. SM 1).

The zeroth-order coupling  $V^{(0)}$  between electron carrier  $i$  and initial donor  $0$  is evaluated according to

$$V_{i0}^{(0)} = \prod_{j=0}^{i-1} V_{ij} \cdot \exp((i-2)\beta_W W)$$

$$\text{with } \beta_W = \beta \cdot \sqrt{\frac{\Delta G_{ij}}{E_B + \Delta G_{ij}}}, \quad (A2)$$

where  $E_B$  is the relative *vacuo* level and  $\beta_W$  is an energy

corrected exponential decay parameter of the wave function within the extent of the charge carrier. The additional first order coupling terms  $V^{(1)}$  can be identified as super-exchange (SE) coupling

$$V_{i0}^{(1)} = V_{i0}^{(SE)} = \sum_{j \neq 0, j \neq i} V_{j0}^{(0)} \frac{V_{ij}}{\Delta G_{ij}}. \quad (A3)$$

45

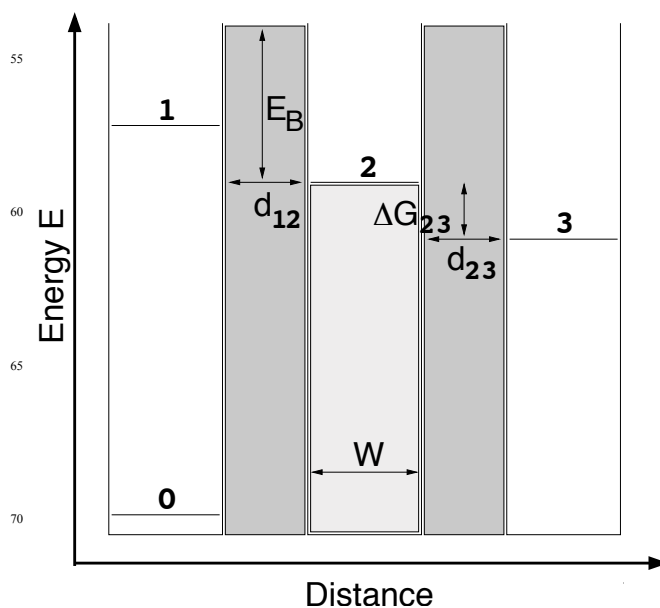

Fig. SM 1: extend and energetic position of three chromophores, contributing to the electronic coupling element  $V_{i0}$  for charge recombination

If charge recombination occurs over large distances ( $d_{i0} > 5-10 \text{ \AA}$ ) the overlap between the tail of the wave-functions is almost negligible. High lying electronic states can mix and SE-coupling contributes significantly to the overall coupling strength. In the model of a linear chain of  $n$  chromophores ( $n > 3$ ) (see Fig. 2) contributions to the electronic coupling  $V_{i0}$  arise from more than a single chromophore. These contributions are considered as second order terms  $V^{(2)}$  and

are calculated according to

$$V_{i0}^{(2)} = V_{i0}^{(ExSE)} = \sum_{j \neq 0, j \neq i} V_{j0}^{(0)} \left( \sum_{j \neq k, i \neq k} \frac{V_{ik} \cdot V_{kj}}{\Delta G_{ij} \cdot \Delta G_{ik}} - \frac{V_{ij} \cdot V_0}{\Delta G_{ij}^2} \right) \quad (A4)$$

This contribution improves the first order treatment of the coupling matrix element for the loss channels. We designate the second order contribution as extended super-exchange coupling  $V^{(ExSE)}$ .

## Notes and references

<sup>a</sup> Department of Chemistry and Biochemistry, Ludwig-Maximilians-Universität München, D-81377 Munich, Germany.

<sup>20</sup> E-mail: Regina.de\_Vivie@cup.uni-muenchen.de

<sup>b</sup> Institut für BioMolekulare Optik and Munich Center for Integrated Protein Science, Ludwig-Maximilians-Universität München, D-80538 Munich, Germany.
